# Supplementary material for: Malat1 deficiency prevents neonatal heart regeneration by inducing cardiomyocyte binucleation
Source: PubMed Central journal article supplement (PMC10077484; doi:10.1172/jci.insight.162124), 2023-03-08

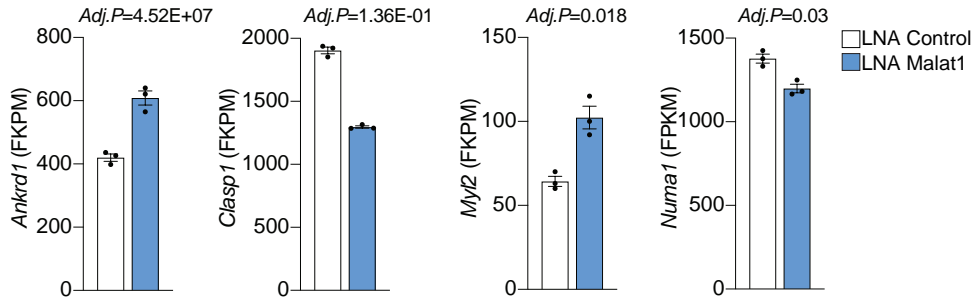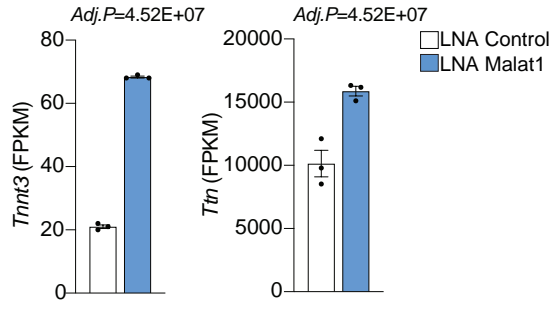

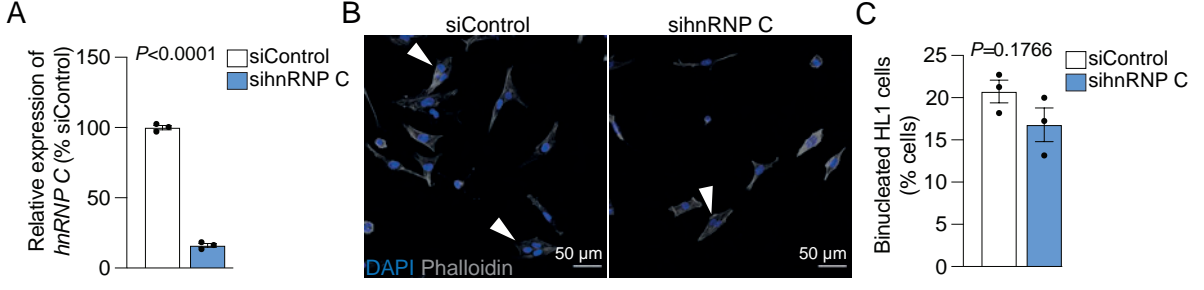

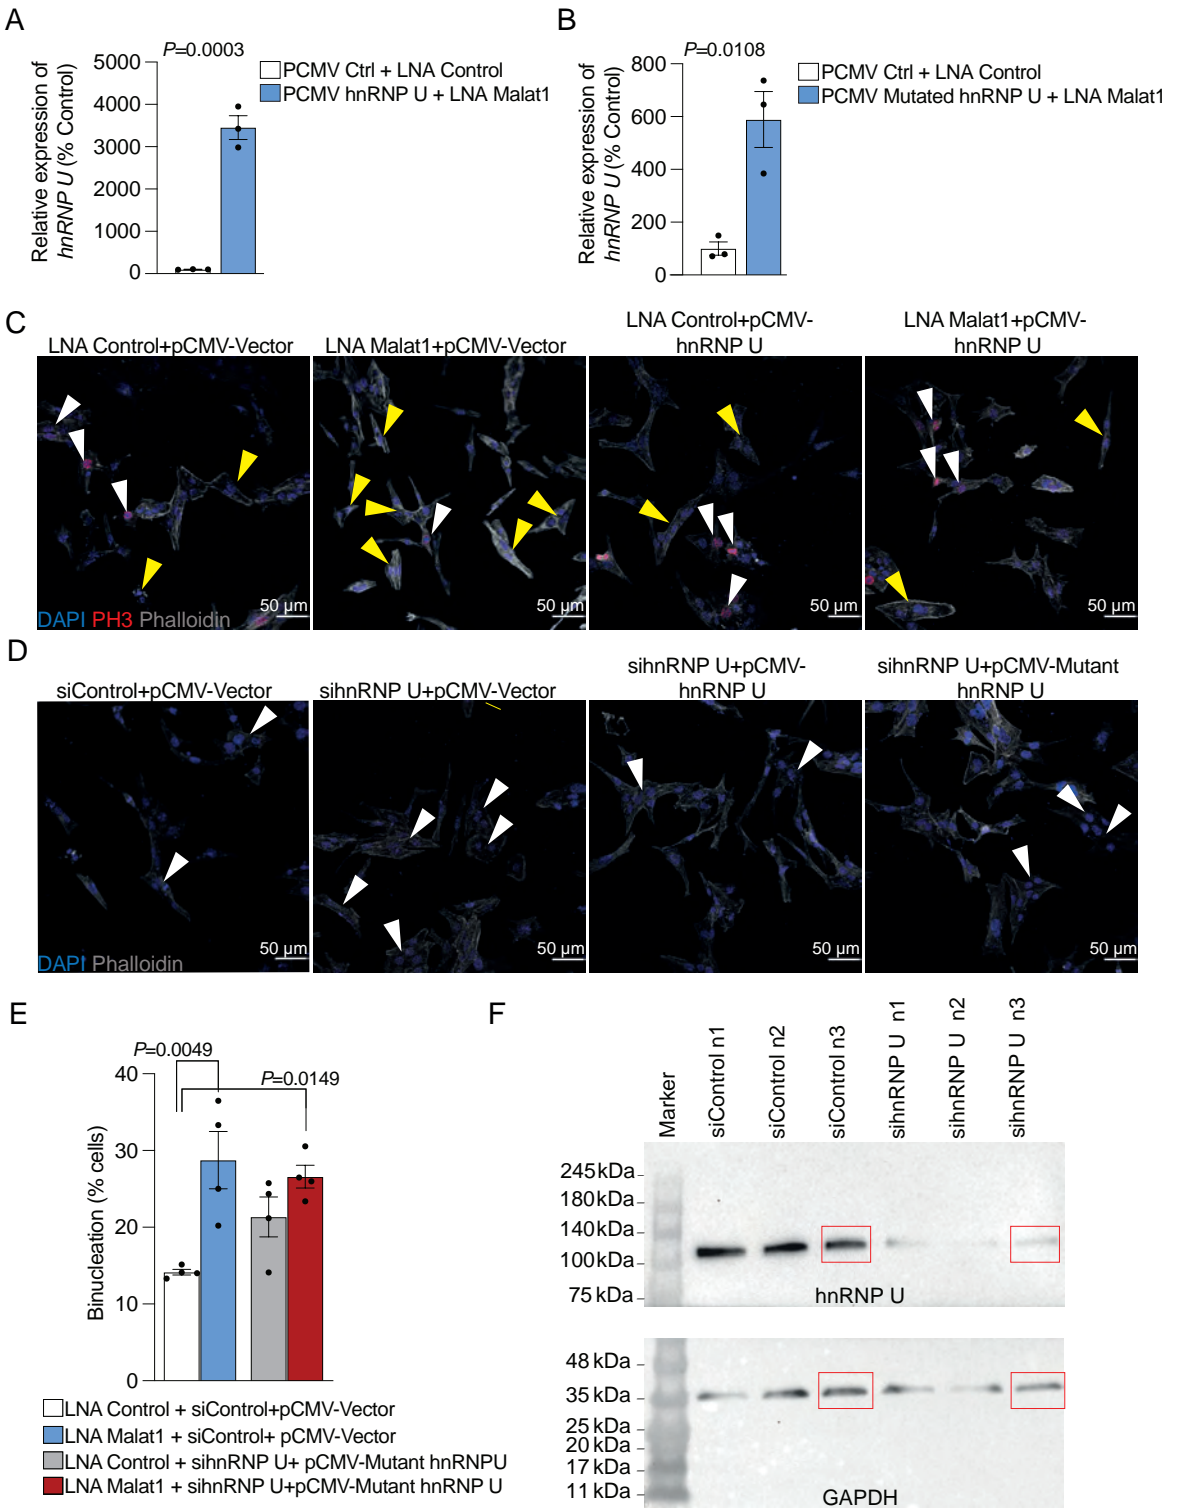

Supplement: jciinsight-8-162124-s092.pdf [file jciinsight-8-162124-s092.pdf]
